# Supplementary material for: The Harris Hawk (Parabuteo unicinctus) in Urban Areas of Argentina: Arrival in Mar Del Plata City and Green Area Use in Buenos Aires City
Source: MDPI journal article supplement (doi:10.3390/ani11041023), 2021-04-05
Supplement: s1 [file s1]

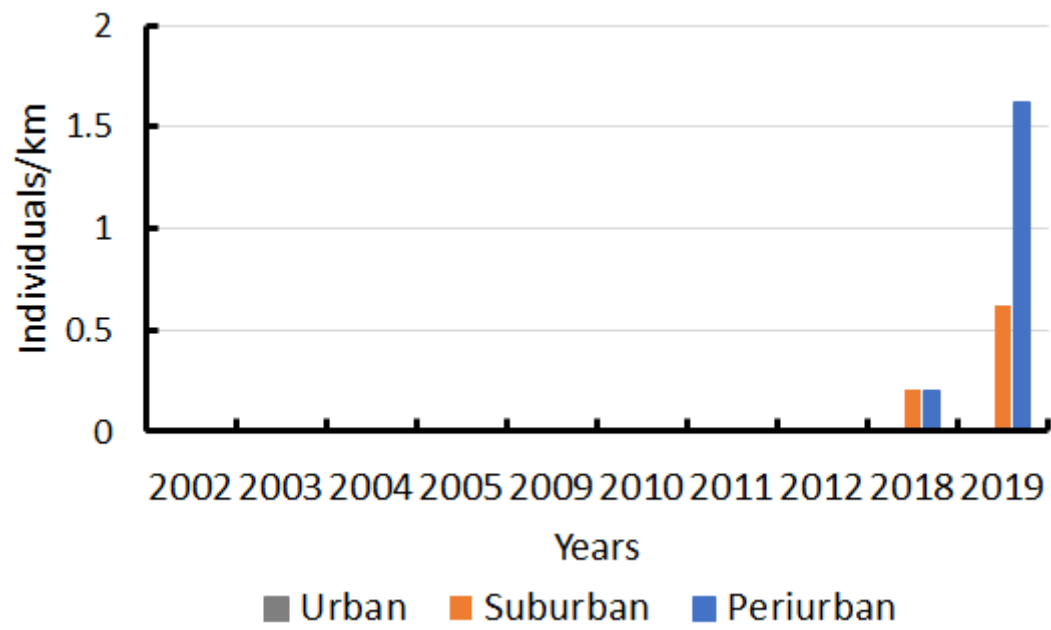

**Figure S1.** Records (individuals/km) of the Harris Hawk during the period 2002-2019 in urban, suburban and periurban areas in Mar del Plata city, Argentina.
